# Supplementary material for: Analgesic effect and safety of single-dose intra-articular magnesium after arthroscopic surgery: a systematic review and meta-analysis
Source: PubMed Central journal article supplement (PMC5128786; doi:10.1038/srep38024), 2016-11-30
Supplement: srep38024-s1.pdf [file srep38024-s1.pdf]

# Analgesic effect and safety of single-dose intra-articular magnesium after arthroscopic surgery: a systematic review and meta-analysis

Chao Zeng<sup>1</sup>, Yu-sheng Li<sup>1</sup>, Jie Wei<sup>2,3</sup>, Dong-xing Xie<sup>1</sup>, Xi Xie<sup>1</sup>, Liang-jun Li<sup>1</sup>, Shu-guang Gao<sup>1</sup>, Wei Luo<sup>1</sup>, Yi-lin Xiong<sup>1</sup>, Wen-feng Xiao<sup>1</sup>, Guang-hua Lei<sup>1\*</sup>

## Appendix 1-Search strategies

Randomized controlled trials:

Pubmed (10)

1. Arthroscopy [tiab] or arthroscopic [tiab] or arthroscope [tiab] or arthrosp\* [tiab]
2. Arthroscopy [Mesh]
3. 1 or 2
4. "Magnesium"[Mesh]
5. "Mg"[tiab] or Magnesium[tiab]
6. 4 or 5
7. randomized[tiab]
8. placebo[tiab]
9. controlled[tiab]
10. random\*[tiab]
11. trial\*[tiab]
12. groups[tiab]
13. ((singl\*[tiab] or doubl\*[tiab] or tripl\*[tiab]) and (mask\*[tiab] or blind\*[tiab]))
14. Or/7-13
15. 3 and 6 and 14

EMBASE (23)

1. (Arthroscopy or arthroscopic or arthroscope or arthrosp\*):ti,ab
2. 'Arthroscopy'/exp
3. 1 or 2
4. Magnesium:ti,ab
5. 'Magnesium'/exp
6. 4 or 5
7. (random\* or control\* or trial\* or placebo):ti,ab
8. 3 and 6 and 7

Cochrane library (16)

1. MeSH descriptor Arthroscopy explode all trees
2. (Arthroscopy or arthroscopic or arthroscope or arthrosp\*):ti,ab,kw
3. 1 or 2
4. MeSH descriptor Magnesium explode all trees
5. Magnesium:ti,ab,kw

6. 4 or 5
7. 3 and 6

In vitro and in vivo experimental studies:

Pubmed (234)

1. "Chondrocytes"[Mesh]
2. Chondrocyt\*[tiab] or Chondroblast\*[tiab]
3. "Cartilage"[Mesh] or cartilage[tiab]
4. 1 or 2 or 3
5. "Magnesium"[Mesh]
6. "Mg"[tiab] or Magnesium[tiab]
7. 5 or 6
8. 4 and 7

Embase (257)

1. 'Chondrocytes'/exp
2. (Chondrocyt\* or Chondroblast\*):ti,ab
3. 'Cartilage'/exp
4. Cartilage:ti,ab
5. 1 or 2 or 3 or 4
6. Magnesium:ti,ab
7. 'Magnesium'/exp
8. 6 or 7
9. 5 and 8

## Appendix 2 Methodological quality of the included studies

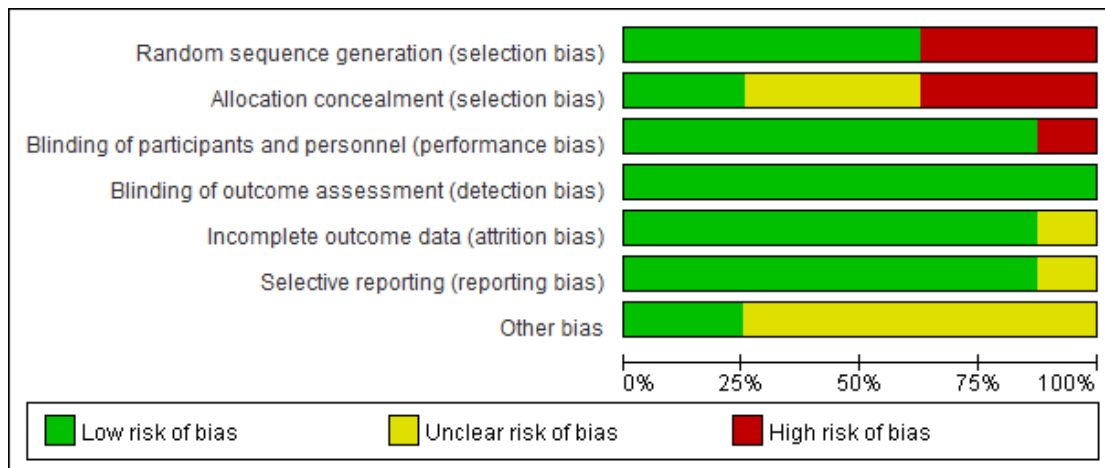

Figure 1 Risk of bias graph: review authors' judgements about each risk of bias item presented as percentages across all included studies.

|                 | Random sequence generation (selection bias) | Allocation concealment (selection bias) | Blinding of participants and personnel (performance bias) | Blinding of outcome assessment (detection bias) | Incomplete outcome data (attrition bias) | Selective reporting (reporting bias) | Other bias |
|-----------------|---------------------------------------------|-----------------------------------------|-----------------------------------------------------------|-------------------------------------------------|------------------------------------------|--------------------------------------|------------|
| Abdulatif 2015  | +                                           | ?                                       | +                                                         | +                                               | ?                                        | ?                                    | +          |
| Bondok 2006     | +                                           | +                                       | +                                                         | +                                               | +                                        | +                                    | ?          |
| Elshamouby 2008 | +                                           | -                                       | +                                                         | +                                               | +                                        | +                                    | ?          |
| Farouk 2009     | -                                           | ?                                       | +                                                         | +                                               | +                                        | +                                    | ?          |
| Koltka 2011     | -                                           | +                                       | -                                                         | +                                               | +                                        | +                                    | ?          |
| Radwan 2013     | +                                           | -                                       | +                                                         | +                                               | +                                        | +                                    | ?          |
| Saritas 2015    | -                                           | ?                                       | +                                                         | +                                               | +                                        | +                                    | +          |
| Suhrita 2009    | +                                           | -                                       | +                                                         | +                                               | +                                        | +                                    | ?          |

Figure 2 Risk of bias summary: review authors' judgements about each risk of bias item for each included study.

### Appendix 3 Sensitivity analyses

Table sensitivity analyses

| Comparison                                                                       | Mg vs placebo        |                                   | Mg vs bupivacaine  |                                   | Mg+bupivacaine vs buvacaine |                                   |
|----------------------------------------------------------------------------------|----------------------|-----------------------------------|--------------------|-----------------------------------|-----------------------------|-----------------------------------|
|                                                                                  | MD [95%CI]           | Heterogeneity (P/I <sup>2</sup> ) | MD [95%CI]         | Heterogeneity (P/I <sup>2</sup> ) | MD [95%CI]                  | Heterogeneity (P/I <sup>2</sup> ) |
| <b>Pain intensity at last follow up</b>                                          |                      |                                   |                    |                                   |                             |                                   |
| Excluded studies with poor methodological quality                                | -0.33 [-0.46, -0.20] | 0.22/33%                          | 0.21 [-1.45, 1.88] | <0.001/92%                        | -0.26 [-1.00, 0.48]         | 0.009/85%                         |
| Excluded studies with femoral nerve block in each group                          | -0.31 [-0.44, -0.18] | 0.26/25%                          | -                  | -                                 | -                           | -                                 |
| Excluded study with levobupivacaine rather than bupivacaine as the control group | -                    | -                                 | 0.21 [-1.45, 1.88] | <0.001/92%                        | -                           | -                                 |
| Excluded study with other type of surgery rather than single knee meniscectomy   | -0.26 [-1.00, 0.48]  | 0.009/85%                         | -                  | -                                 | -0.62 [-0.81, -0.42]        | 0.72/0%                           |
| Excluded study which reported data by median and range                           | -0.50 [-0.92, -0.09] | <0.001/84%                        | 0.21 [-1.45, 1.88] | <0.001/92%                        | -                           | -                                 |
| <b>Time to first request of analgesic</b>                                        |                      |                                   |                    |                                   |                             |                                   |
| Excluded studies with poor methodological quality                                | 5.53 [-3.78, 14.84]  | <0.001/100%                       | 0.04 [-6.72, 6.80] | <0.001/99%                        | 6.58 [6.06, 7.09]           | 0.22/34%                          |
| Excluded studies with femoral nerve block in each group                          | 4.24 [-0.53, 9.01]   | <0.001/99%                        | -                  | -                                 | -                           | -                                 |
| Excluded study with                                                              | -                    | -                                 | 0.04 [-6.72, 6.80] | <0.001/99%                        | -                           | -                                 |

levobupivacaine rather than  
bupivacaine as the control group

|                                                                                      |                    |            |   |   |                   |          |
|--------------------------------------------------------------------------------------|--------------------|------------|---|---|-------------------|----------|
| Excluded study with other type of<br>surgery rather than single knee<br>meniscectomy | 4.24 [-0.53, 9.01] | <0.001/99% | - | - | 5.78 [4.34, 7.23] | 0.05/74% |
|--------------------------------------------------------------------------------------|--------------------|------------|---|---|-------------------|----------|

---

Mg, magnesium.

## Appendix 4-Subgroup analyses

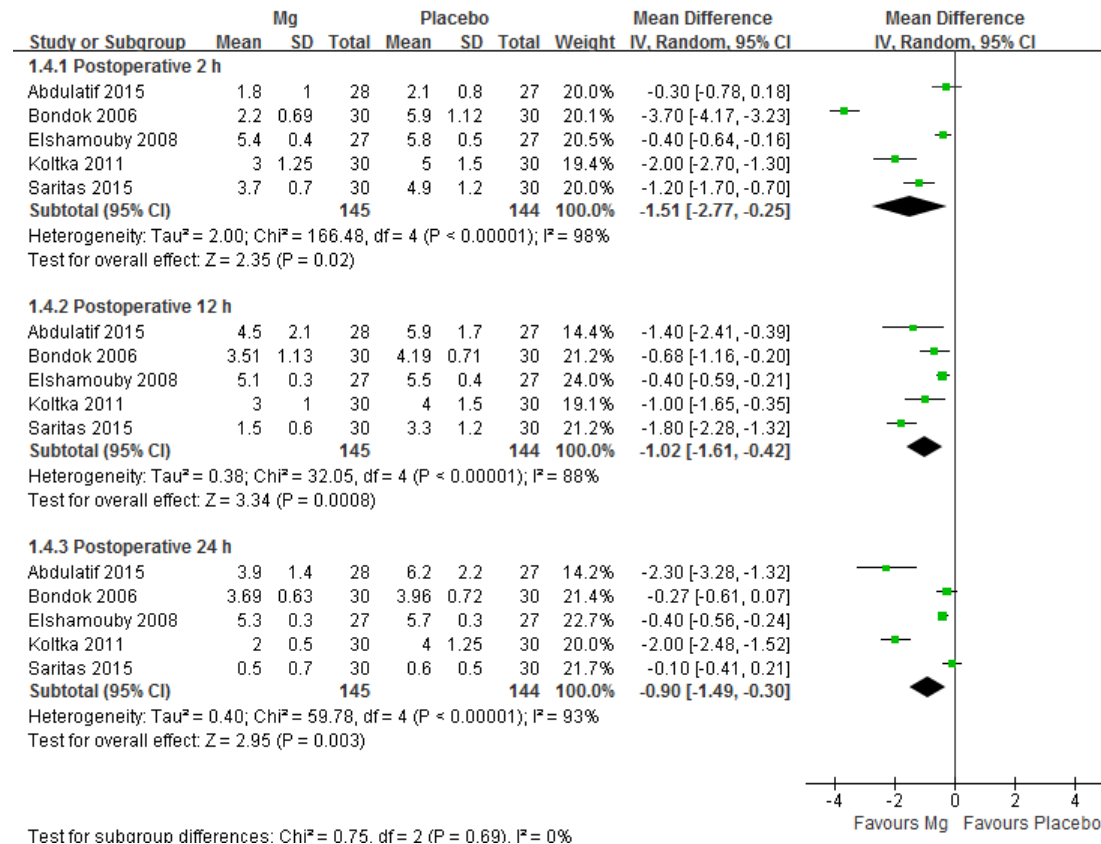

Figure 1 Forest plot of pain intensity at different follow-up time points between Mg and placebo.

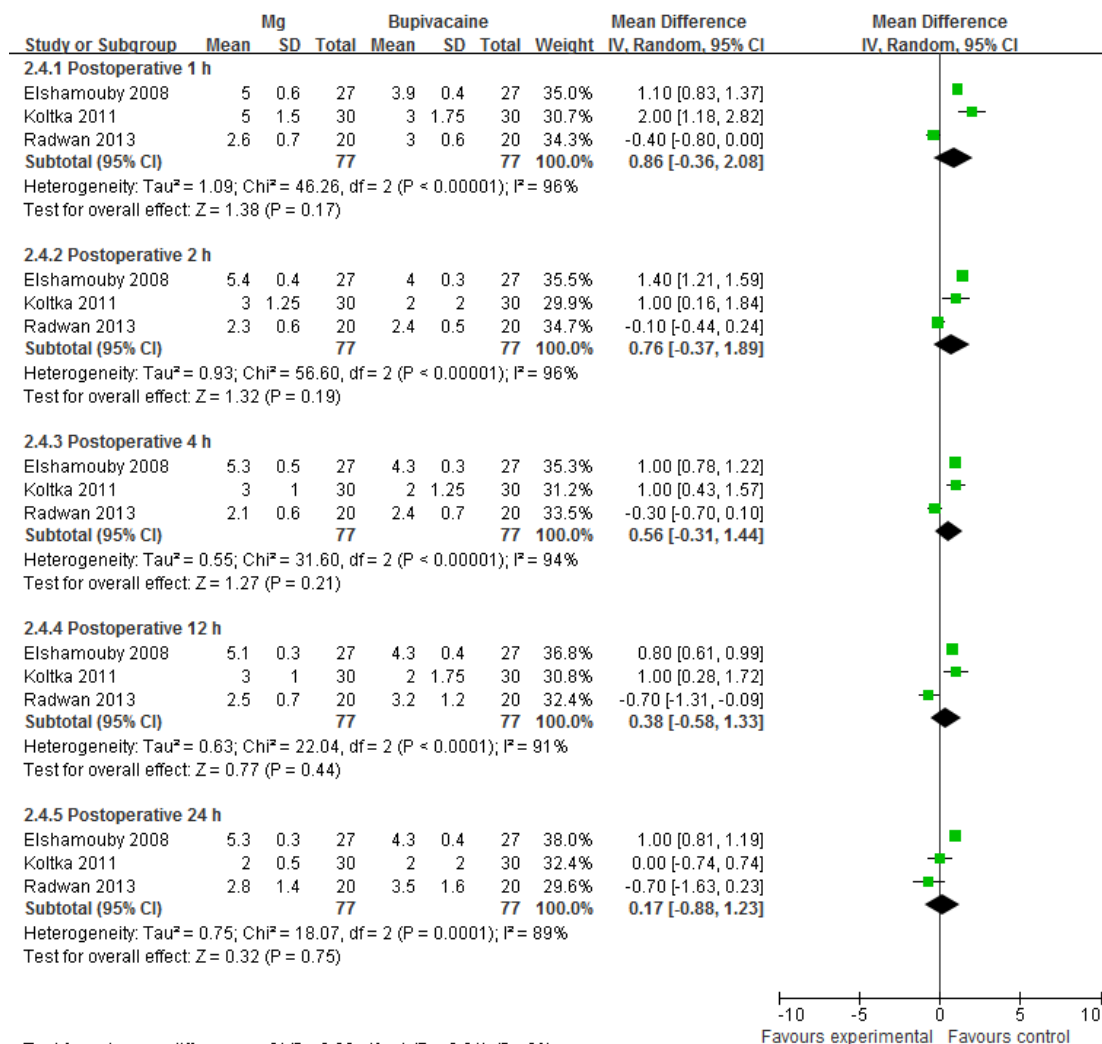



Figure 2 Forest plot of pain intensity at different follow-up time points between Mg and bupivacaine.

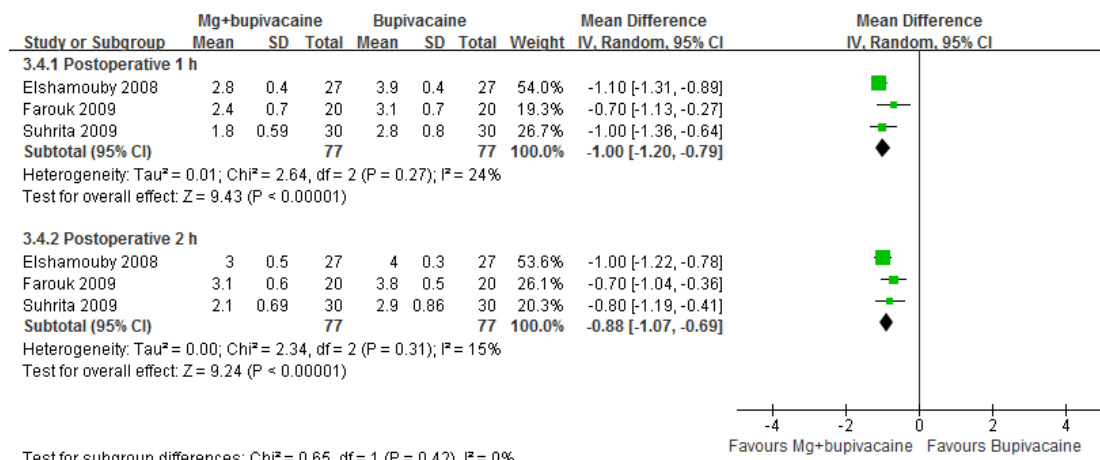

Figure 3 Forest plot of pain intensity at different follow-up time points between Mg plus bupivacaine and bupivacaine alone.
